# Supplementary material for: In Silico Insight into Potential Anti-Alzheimer’s Disease Mechanisms of Icariin
Source: MDPI journal article supplement (doi:10.3390/ijms17010113), 2016-01-15
Supplement: s1 [file s1]

# Supplementary Materials: *In Silico* Insight into Potential Anti-Alzheimer's Disease Mechanisms of Icariin

Zhijie Cui, Zhen Sheng, Xinmiao Yan, Zhiwei Cao and Kailin Tang

**Table S1.** 59 potential targets of icariin predicted by INVDOCK.

| Uniprot | Gene Symbol | Gene ID | Target Type  |
|---------|-------------|---------|--------------|
| Q13464  | ROCK1       | 6093    | experimental |
| P00439  | PAH         | 5053    | approved     |
| Q9HAN9  | NMNAT1      | 64802   | experimental |
| Q9BW91  | NUDT9       | 53343   | experimental |
| P50135  | HNMT        | 3176    | approved     |
| Q10588  | BST1        | 683     | experimental |
| P06737  | PYGL        | 5836    | approved     |
| O75874  | IDH1        | 3417    | experimental |
| P00750  | PLAT        | 5327    | approved     |
| O76074  | PDE5        | 8654    | approved     |
| P84077  | ARF1        | 375     | experimental |
| P63098  | PPP3R1      | 5534    | experimental |
| Q08209  | PPP3CA      | 5530    | experimental |
| P12821  | ACE         | 1636    | approved     |
| P43490  | NAMPT       | 10135   | experimental |
| O75164  | JMJD2A      | 9682    | NA           |
| P04040  | CAT         | 847     | approved     |
| P06276  | BCHE        | 590     | approved     |
| Q92871  | PMM1        | 5372    | NA           |
| P04181  | OAT         | 4942    | approved     |
| P13569  | CFTR        | 1080    | approved     |
| P02774  | GC          | 2638    | approved     |
| O14815  | CAPN9       | 10753   | NA           |
| P11387  | TOP1        | 7150    | approved     |
| P48736  | PIK3CG      | 5294    | experimental |
| Q16836  | HADH        | 3033    | experimental |
| Q92947  | GCDH        | 2639    | approved     |
| P04062  | GBA         | 2629    | approved     |
| Q9NWZ3  | IRAK4       | 51135   | experimental |
| P51795  | CLCN5       | 1184    | NA           |
| Q8TBC4  | UBA3        | 9039    | NA           |
| Q9Y5S9  | RBM8A       | 9939    | NA           |
| Q9UKL6  | PCTP        | 58488   | experimental |
| Q96T66  | NMNAT3      | 349565  | experimental |
| P28907  | CD38        | 952     | NA           |
| Q10471  | GALNT2      | 2590    | NA           |
| P15291  | B4GALT1     | 2683    | approved     |
| Q9UBT2  | UBA2        | 10054   | NA           |
| P07737  | PFN1        | 5216    | experimental |
| Q07889  | SOS1        | 6654    | NA           |
| P04406  | GAPDH       | 2597    | experimental |

Table S1. Cont.

| Uniprot | Gene Symbol | Gene ID | Target Type  |
|---------|-------------|---------|--------------|
| P14902  | INDO        | 3620    | approved     |
| P35080  | PFN2        | 5217    | experimental |
| P04183  | TK1         | 7083    | approved     |
| P21399  | ACO1        | 48      | NA           |
| P09012  | SNRPA       | 6626    | experimental |
| P14678  | SNRPB       | 6628    | NA           |
| Q86SR1  | GALNT10     | 55568   | NA           |
| P19367  | HK1         | 3098    | experimental |
| P19883  | FST         | 10468   | experimental |
| P08476  | INHBA       | 3624    | NA           |
| P0DMV8  | HSPA1A      | 3303    | NA           |
| P0DMV9  | HSPA1B      | 3304    | NA           |
| P27695  | APEX1       | 328     | approved     |
| P02686  | MBP         | 4155    | NA           |
| P17655  | CAPN2       | 824     | NA           |
| P52789  | HK2         | 3099    | NA           |
| P22303  | AChE        | 43      | approved     |
| P14902  | INDO        | 3620    | approved     |

**Table S2.** The binding affinity comparison between icariin and corresponding known ligand in same protein target (all).

| Uniprot  | Gene Symbol | PDB Code | Known Ligands                                                               |                    |                | Icariin            |                |
|----------|-------------|----------|-----------------------------------------------------------------------------|--------------------|----------------|--------------------|----------------|
|          |             |          | Name                                                                        | MM/GBVI (kcal/mol) | Affinity (pki) | MM/GBVI (kcal/mol) | Affinity (pki) |
| Q13464 * | ROCK1       | 2ETK     | Hydroxyfasudil                                                              | -21.03             | 8.10           | -33.02             | 14.34          |
| P00439 * | PAH         | 4PAH     | Norepinephrine                                                              | -26.24             | 7.05           | -44.04             | 7.90           |
| Q9HAN9 * | NMNAT1      | 1GZU     | Nicotinamide Mononucleotide                                                 | -27.30             | 12.54          | -23.15             | 17.75          |
| Q9BW91 * | NUDT9       | 1Q33     | $\beta$ -D-Glucose                                                          | -24.64             | 10.70          | -34.00             | 13.26          |
| P50135 * | HNMT        | 2AOU     | Amodiaquine                                                                 | -26.05             | 6.91           | -20.88             | 7.00           |
| Q10588 * | BST1        | 1ISG     | Adenosine-5'-diphosphate Monothiophosphate                                  | -14.33             | 9.41           | -24.31             | 10.99          |
| P06737 * | PYGL        | 1FA9     | Adenosine Monophosphate                                                     | -17.06             | 8.66           | -27.18             | 9.79           |
| O75874   | IDH1        | 3MAP     | Isocitric Acid                                                              | -23.70             | 11.44          | -6.68              | 12.24          |
| P00750 * | PLAT        | 1PK2     | Aminocaproic Acid                                                           | -19.90             | 9.71           | -24.92             | 9.30           |
| O76074 * | PDE5        | 2H42     | Sildenafil                                                                  | -36.25             | 9.67           | -28.87             | 13.89          |
| P12821   | ACE         | 2X92     | Ramipril                                                                    | -75.94             | 18.17          | -28.89             | 12.78          |
| P43490   | NAMPT       | 2GVJ     | N-[4-(1-Benzoylpiperidin-4-yl)butyl]-3-pyridin-3-ylpropanamide              | -36.335            | 8.765          | -1.330             | 10.173         |
| P06276   | BCHE        | 4BDS     | Tacrine                                                                     | -14.76             | 5.99           | 34.33              | 11.88          |
| P04181   | OAT         | 2CAN     | Canaline                                                                    | -31.83             | 17.52          | -20.51             | 14.68          |
| P48736   | PIK3CG      | 1E8Z     | Staurosporine                                                               | -20.34             | 10.29          | 19.19              | 18.11          |
| Q16836   | HADH        | 1F17     | NADH                                                                        | -56.41             | 15.93          | -19.99             | 11.56          |
| Q92947   | GCDH        | 1SIQ     | Flavin adenine dinucleotide                                                 | -51.45             | 11.24          | -31.74             | 11.81          |
| P04062 * | GBA         | 2F61     | 2-(Acetylamino)-2-deoxy- $\alpha$ -D-glucopyranose                          | -16.41             | 5.57           | -21.80             | 11.17          |
| Q9NWZ3   | IRAK4       | 2NRU     | 1-(3-Hydroxypropyl)-2-[(3-nitrobenzoyl)amino]-1h-benzimidazol-5-yl Pivalate | -38.29             | 9.69           | -15.97             | 13.96          |
| Q9UKL6   | PCTP        | 1LN3     | Palmitoyl-Linoleoyl Phosphatidylcholine                                     | -70.20             | 15.41          | -14.06             | 14.00          |
| Q96T66   | NMNAT3      | 1NUT     | $\alpha$ , $\beta$ -Methyleneadenosine-5'-triphosphate                      | -78.12             | 16.31          | -37.47             | 15.35          |
| P15291 * | B4GALT1     | 4EEG     | N-Acetyl-D-glucosamine                                                      | -19.15             | 8.97           | -34.21             | 10.75          |
| P07737 * | PFN1        | 1CJF     | 7-Hydroxy-4-methyl-3-(2-hydroxy-ethyl)coumarin                              | -15.42             | 6.61           | -27.05             | 8.67           |
| P35080   | PFN2        | 1D1J     | 1-Methoxy-2-[2-(2-methoxy-ethoxy)]-ethane                                   | -8.23              | 3.24           | 52.45              | 14.16          |
| P04183   | TK1         | 1XBT     | Trifluridine                                                                | -181.66            | 27.76          | 35.21              | 13.53          |
| P09012 * | SNRPA       | 1NU4     | Malonic acid                                                                | -22.16             | 6.52           | -23.86             | 5.34           |
| P19367   | HK1         | 1CZA     | $\alpha$ -D-Glucose-6-phosphate                                             | -62.52             | 15.02          | -14.46             | 10.65          |
| P84077 * | ARF1        | 1U81     | 1,3-Propandiol                                                              | -37.77             | 4.64           | -43.17             | 11.18          |
| P63098   | PPP3R1      | 1MF8     | ISA247                                                                      | -45.73             | 14.07          | -30.17             | 15.09          |
| Q08209 * | PPP3CA      | 4F0Z     | Myristic acid                                                               | -15.56             | 4.64           | -22.51             | 8.90           |
| P04040   | CAT         | 1DGH     | Fomepizole                                                                  | -9.18              | 4.72           | 0.86               | 17.26          |
| P13569 * | CFTR        | 2BBO     | Ibuprofen                                                                   | -8.23              | 6.00           | -6.62              | 11.014         |

Table S2. Cont.

| Uniprot  | Gene Symbol | PDB Code | Known Ligands                         |                    |                | Icariin            |                |
|----------|-------------|----------|---------------------------------------|--------------------|----------------|--------------------|----------------|
|          |             |          | Name                                  | MM/GBVI (kcal/mol) | Affinity (pki) | MM/GBVI (kcal/mol) | Affinity (pki) |
| P02774 * | GC          | 1J78     | Cholecalciferol                       | −10.99             | 5.05           | −21.56             | 6.43           |
| P11387 * | TOP1        | 1TL8     | Irinotecan                            | −34.75             | 14.32          | −20.04             | 17.80          |
| P04406   | GAPDH       | 1U8F     | Thionicotinamide-Adenine-Dinucleotide | −47.00             | 8.60           | −25.29             | 8.29           |
| P14902   | INDO        | 4PK5     | Melatonin                             | −7.34              | 6.32           | −1.35              | 15.63          |
| P19883 * | FST         | 2B0U     | D-Myo-Inositol-Hexasulphate           | −9.54              | 7.03           | −24.81             | 9.78           |
| P27695 * | APEX1       | 4QHE     | Lucanthone                            | −16.70             | 4.25           | −17.73             | 4.56           |
| P22303 * | AChE        | 1F8U     | Mefloquine                            | −11.44             | 6.54           | −34.86             | 7.97           |

For each therapeutic target, same active pocket site was adopted for binding affinity comparison between icariin and known ligands. The docking was demonstrated and refined using the software MOE with the parameters of Receptor: Receptor + Solvent; Placement: Triangle Mather; Rescoring 1: London dG, Retain: 30; Refinement: Forcefield (MMFF94x); Rescoring 2: London dG, Retain: 30. Targets (Uniprot ID) labeled by “\*” are regarded as strong or true effect by icariin since icariin-target interactions show comparative binding affinities (better or close MM/GBVI or pki value).
